# Supplementary material for: Dermal Delivery of Korean Red Ginseng Extract: Impact on Storage Stability of Different Carrier Systems and Evaluation of Rg1 and Rb1 Skin Permeation Ex Vivo
Source: MDPI journal article supplement (doi:10.3390/pharmaceutics15010056), 2022-12-24
Supplement: s1 [file s1]

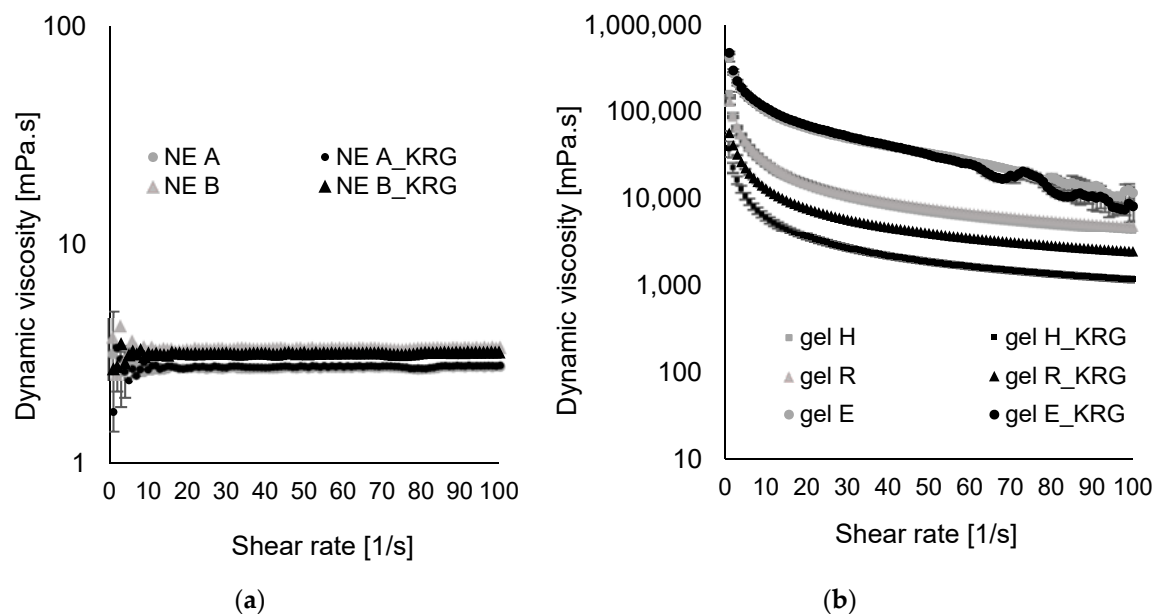

**Figure S1.** Viscosity curves of (a) oil-in-water NEs and (b) hydrogels with and without KRG extract at a shear rate of 1 - 100 s<sup>-1</sup> measured after production (week 0 = after 24 hours, both in mPas using logarithmic scale). (a) grey circles: NE A, black circles: NE A\_KRG, grey triangles: NE B, black triangles: NE B\_KRG. (b) grey squares: gel H, black squares: gel H\_KRG, grey triangles: gel R, black triangles: gel R\_KRG, grey circles: gel E, black circles: gel E\_KRG. Values are means  $\pm$ SD of n=3 formulations analysed at room temperature (23°C).

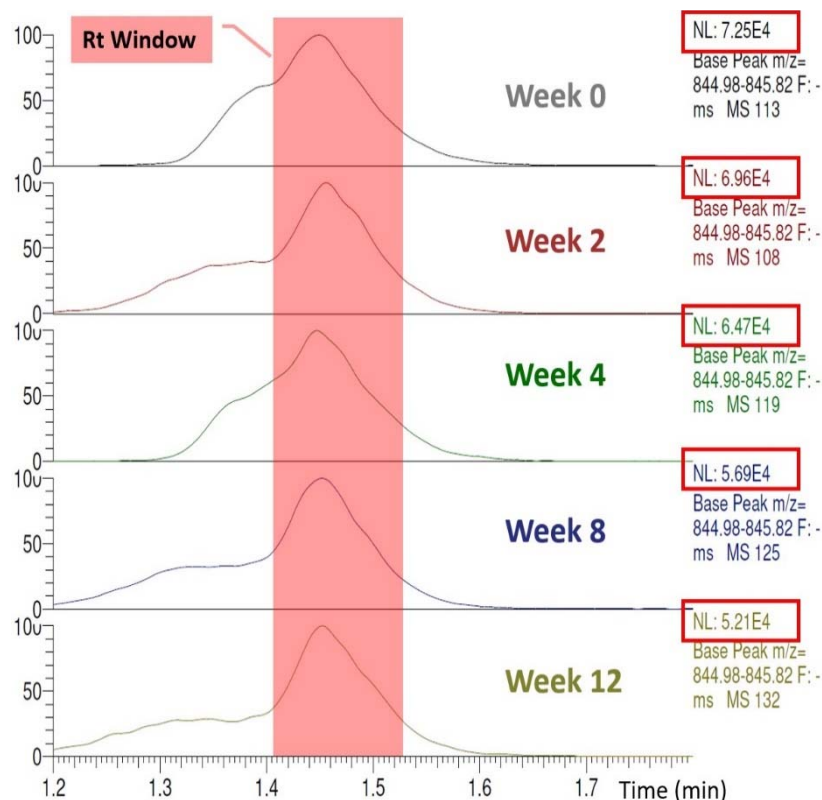

**Figure S2.** Dynamic degradation of ginsenoside Rg1 as assessed by UHPLC/MS, shown in an exemplary manner for formulation NE A<sub>1</sub>. The retention time (x-axis) as used by the alignment and integration algorithm is marked with a red overlay. The relative intensity normalized to the maximum intensity (NL value, red rectangle) of total ion current in mass spectrometry is depicted on the y-axis.

**Table S1.** Effect of KRG extract on formulation properties (2 NE types, 3 hydrogel types) after production. Shown parameters for NEs are mean hydrodynamic diameter in nm, polydispersity index (PDI), zeta potential (ZP) in mV, pH and dynamic viscosity  $\eta$  in Pa·s at a shear rate of 10 s<sup>-1</sup>. For hydrogels, parameters of interest are pH and dynamic viscosity  $\eta$  in Pa·s at a shear rate of 10 s<sup>-1</sup>. Values are means  $\pm$  SD of n=3 formulations.

|                  | d [nm]            | PDI               | ZP [mV]           | pH              | $\eta$ [Pa·s] at 10/s |
|------------------|-------------------|-------------------|-------------------|-----------------|-----------------------|
| <b>NE A</b>      | 137.71 $\pm$ 4.82 | 0.110 $\pm$ 0.001 | -50.28 $\pm$ 3.50 | 6.70 $\pm$ 0.01 | 2.73 $\pm$ 0.06       |
| <b>NE A_KRG</b>  | 132.03 $\pm$ 4.45 | 0.105 $\pm$ 0.007 | -45.13 $\pm$ 2.91 | 5.69 $\pm$ 0.01 | 2.70 $\pm$ 0.15       |
| <b>NE B</b>      | 100.52 $\pm$ 4.64 | 0.091 $\pm$ 0.010 | -56.12 $\pm$ 1.74 | 6.70 $\pm$ 0.02 | 3.25 $\pm$ 0.06       |
| <b>NE B_KRG</b>  | 97.49 $\pm$ 2.65  | 0.095 $\pm$ 0.014 | -45.19 $\pm$ 1.50 | 5.64 $\pm$ 0.06 | 3.20 $\pm$ 0.04       |
| <b>Gel H</b>     |                   |                   |                   | 5.30 $\pm$ 0.03 | 24761 $\pm$ 757       |
| <b>Gel H_KRG</b> |                   |                   |                   | 5.09 $\pm$ 0.07 | 6343 $\pm$ 542        |
| <b>Gel R</b>     |                   |                   |                   | 6.55 $\pm$ 0.08 | 27676 $\pm$ 454       |
| <b>Gel R_KRG</b> |                   |                   |                   | 6.26 $\pm$ 0.06 | 13136 $\pm$ 92        |
| <b>Gel E</b>     |                   |                   |                   | 7.60 $\pm$ 0.04 | 103436 $\pm$ 3966     |
| <b>Gel E_KRG</b> |                   |                   |                   | 5.92 $\pm$ 0.07 | 111880 $\pm$ 3578     |
